# Supplementary material for: Intron retention and nuclear loss of SFPQ are molecular hallmarks of ALS
Source: PubMed Central journal article supplement (PMC5964114; doi:10.1038/s41467-018-04373-8), 2018-05-22
Supplement: 41467_2018_4373_MOESM2_ESM.pdf [file 41467_2018_4373_MOESM2_ESM.pdf]

## **Description of Additional Supplementary Files**

**File Name:** Supplementary Data 1

**Description:** Metadata table of the RNA-seq samples generated in this study.
